# Supplementary material
Source: bioRxiv or medRxiv preprint supplement (https://www.biorxiv.org/highwire/filestream/35469/field_highwire_adjunct_files/11/077701-7.pdf)
Supplement: Supplementary file [file 077701-7.pdf]

### Activating Invasion and Metastasis

### Tumour-Promoting Inflammation

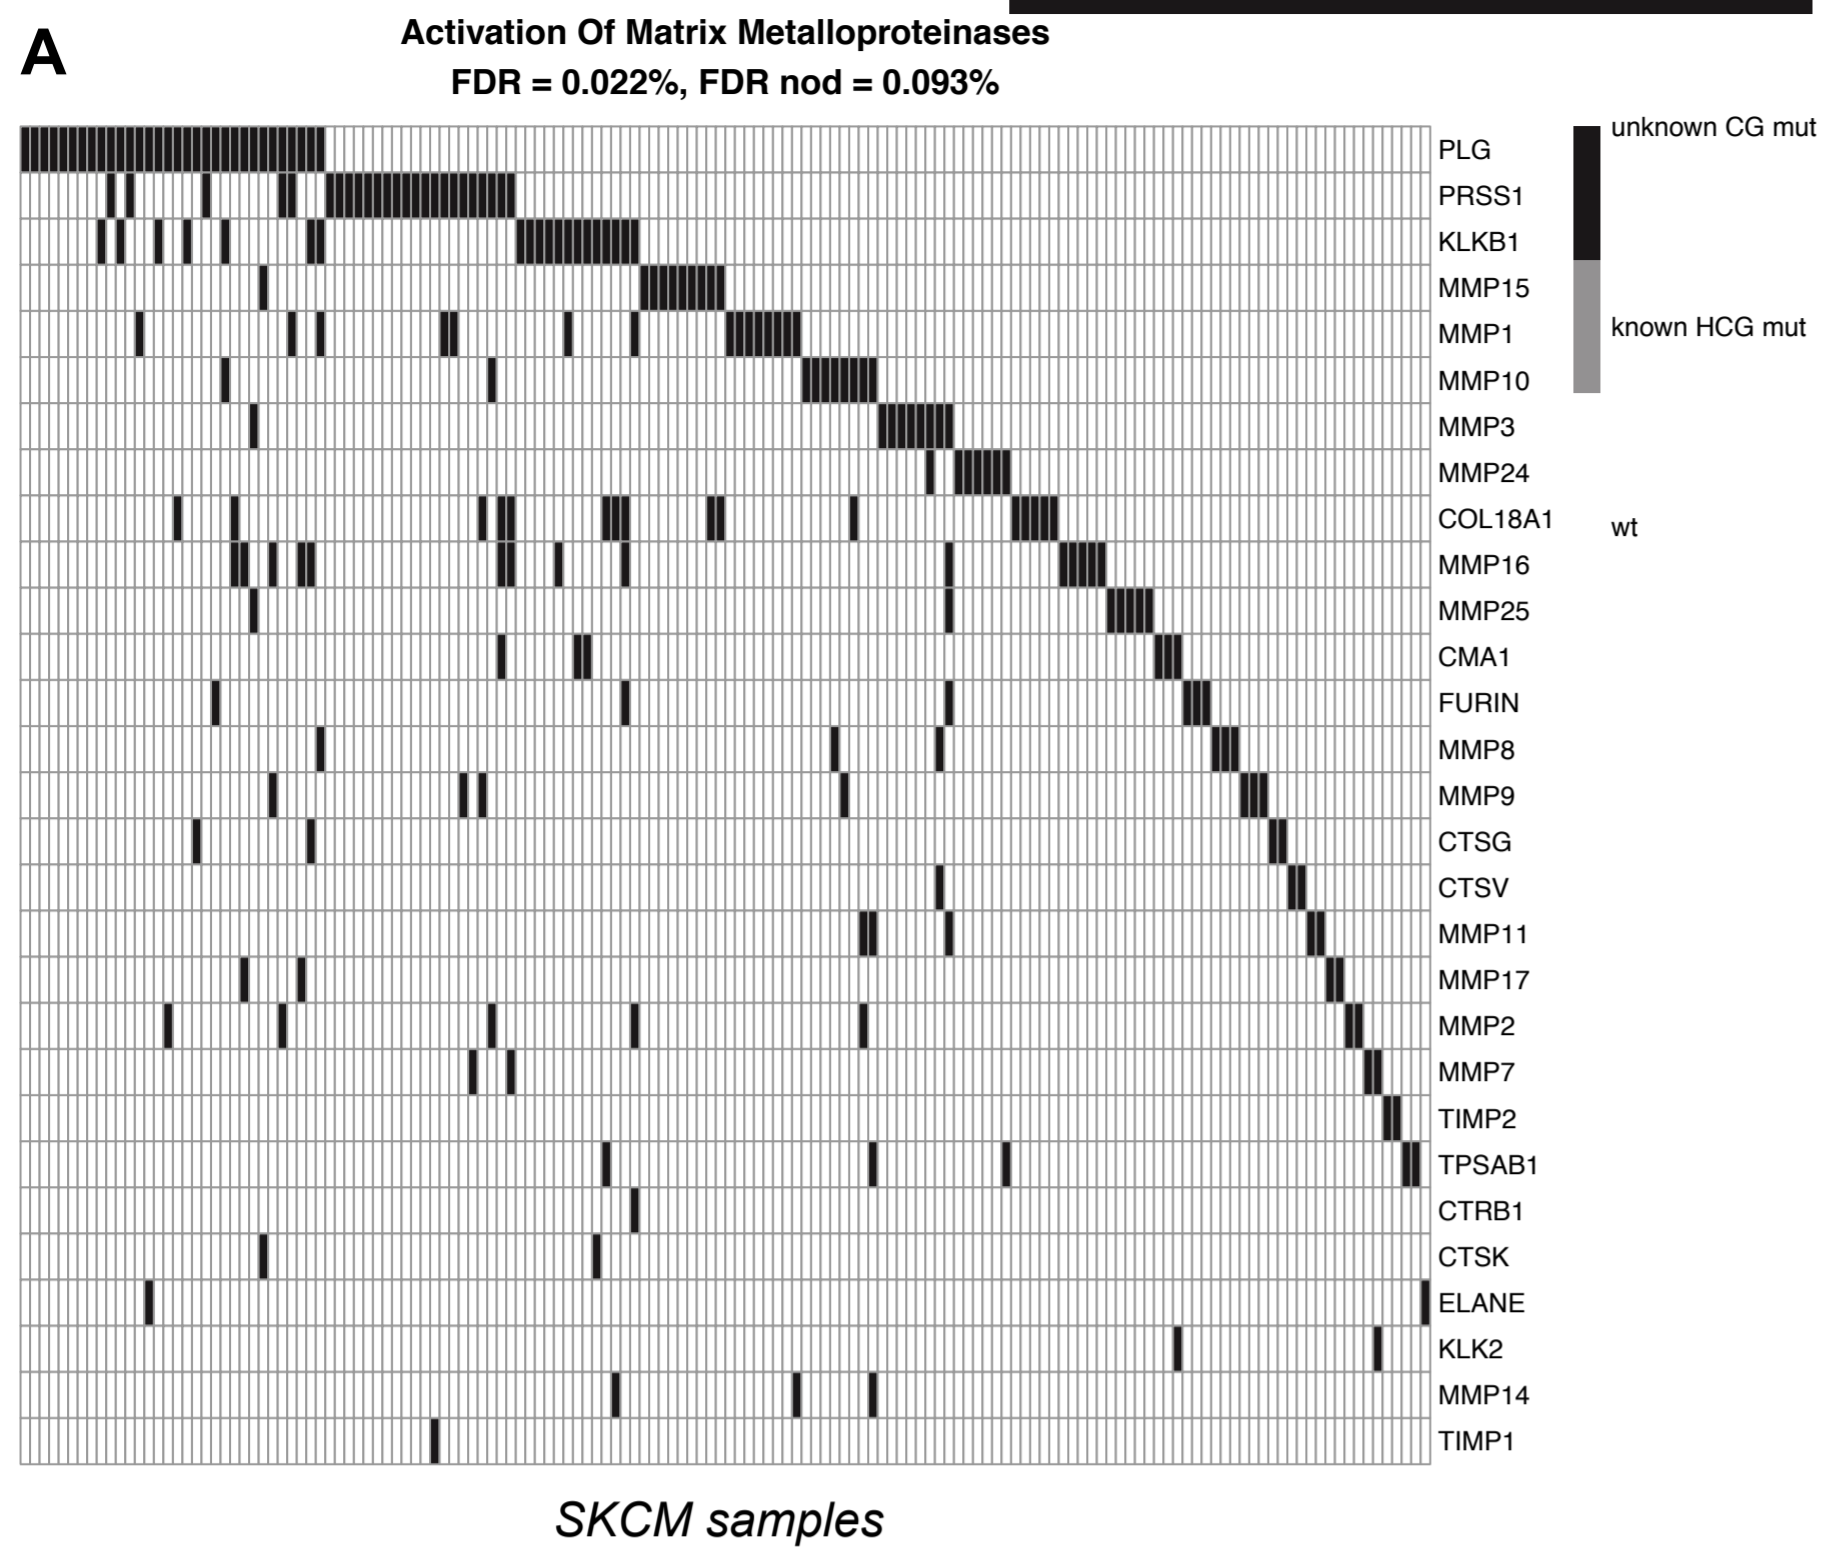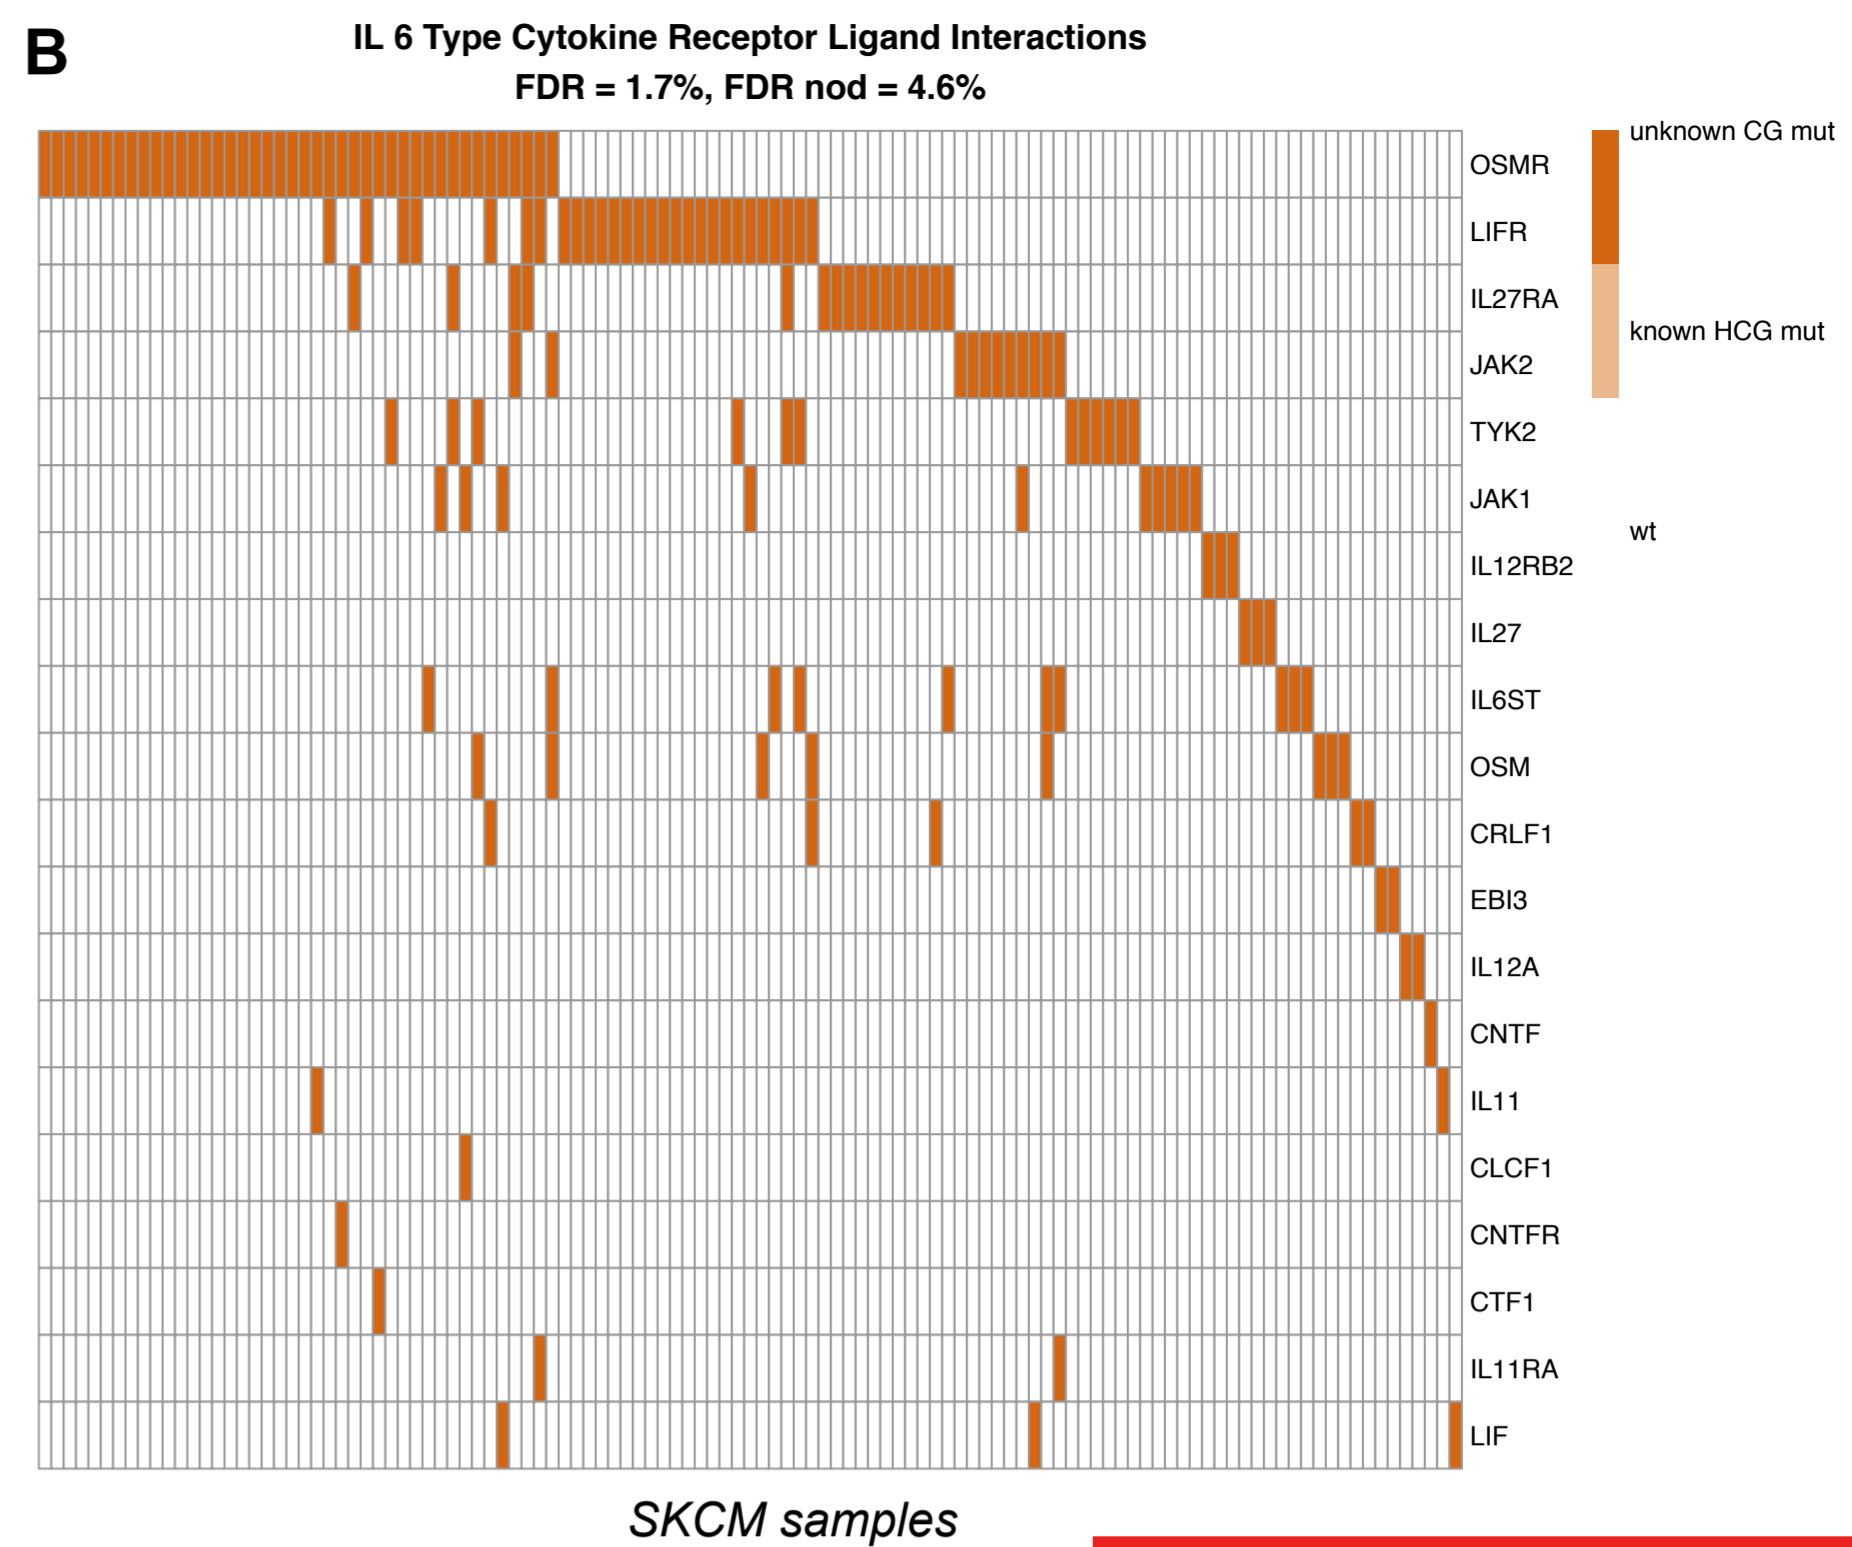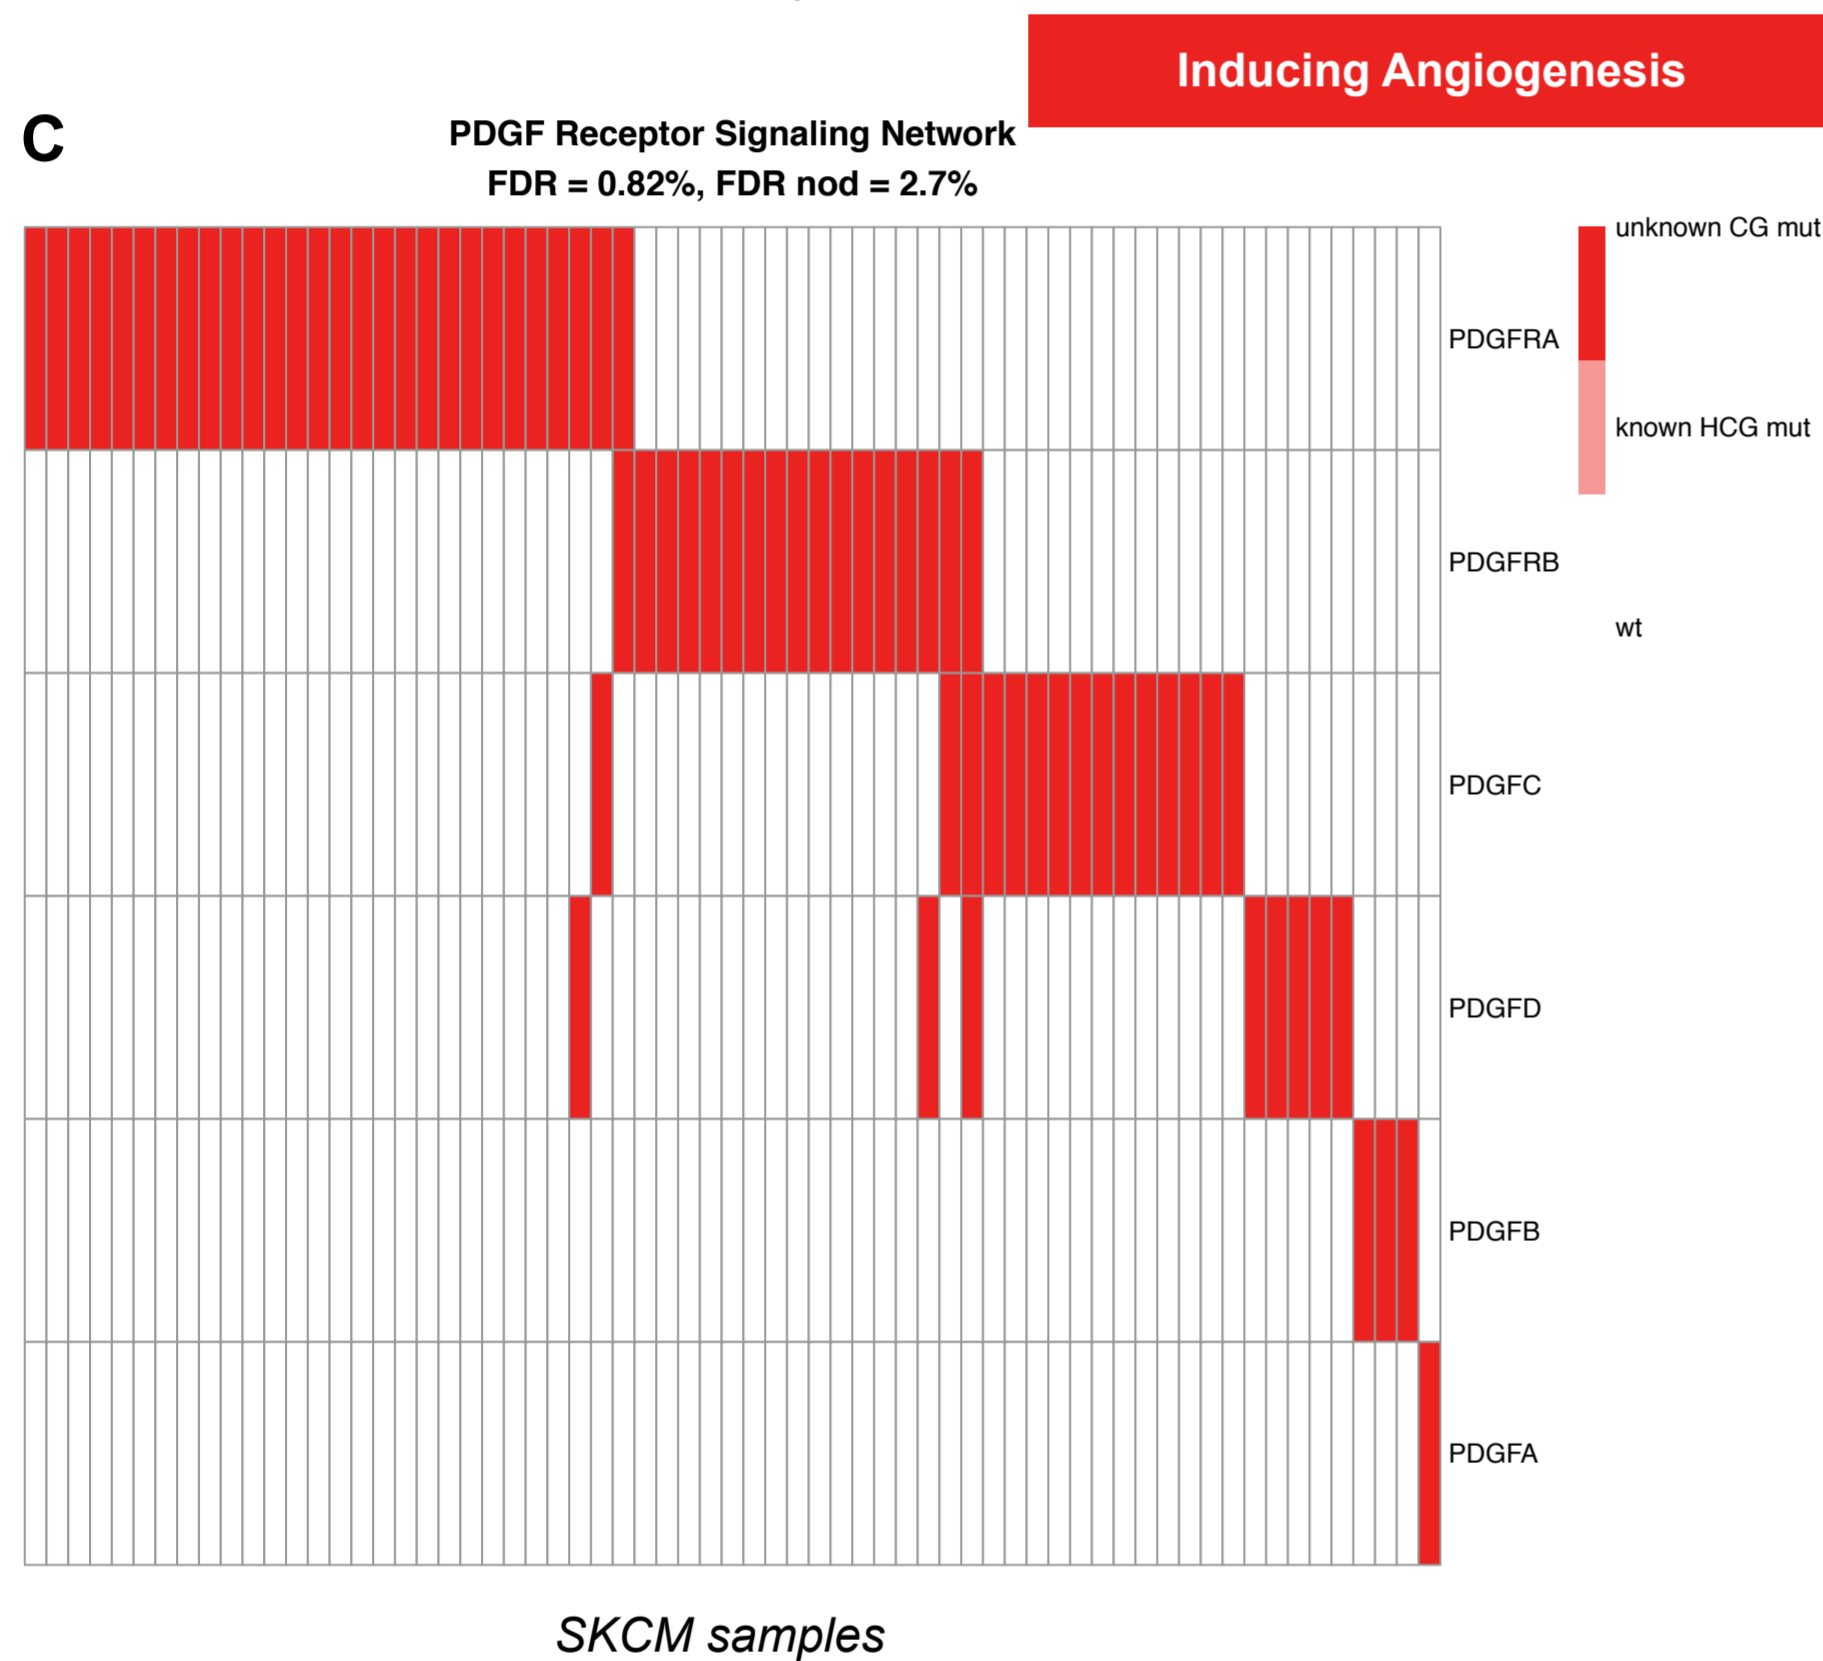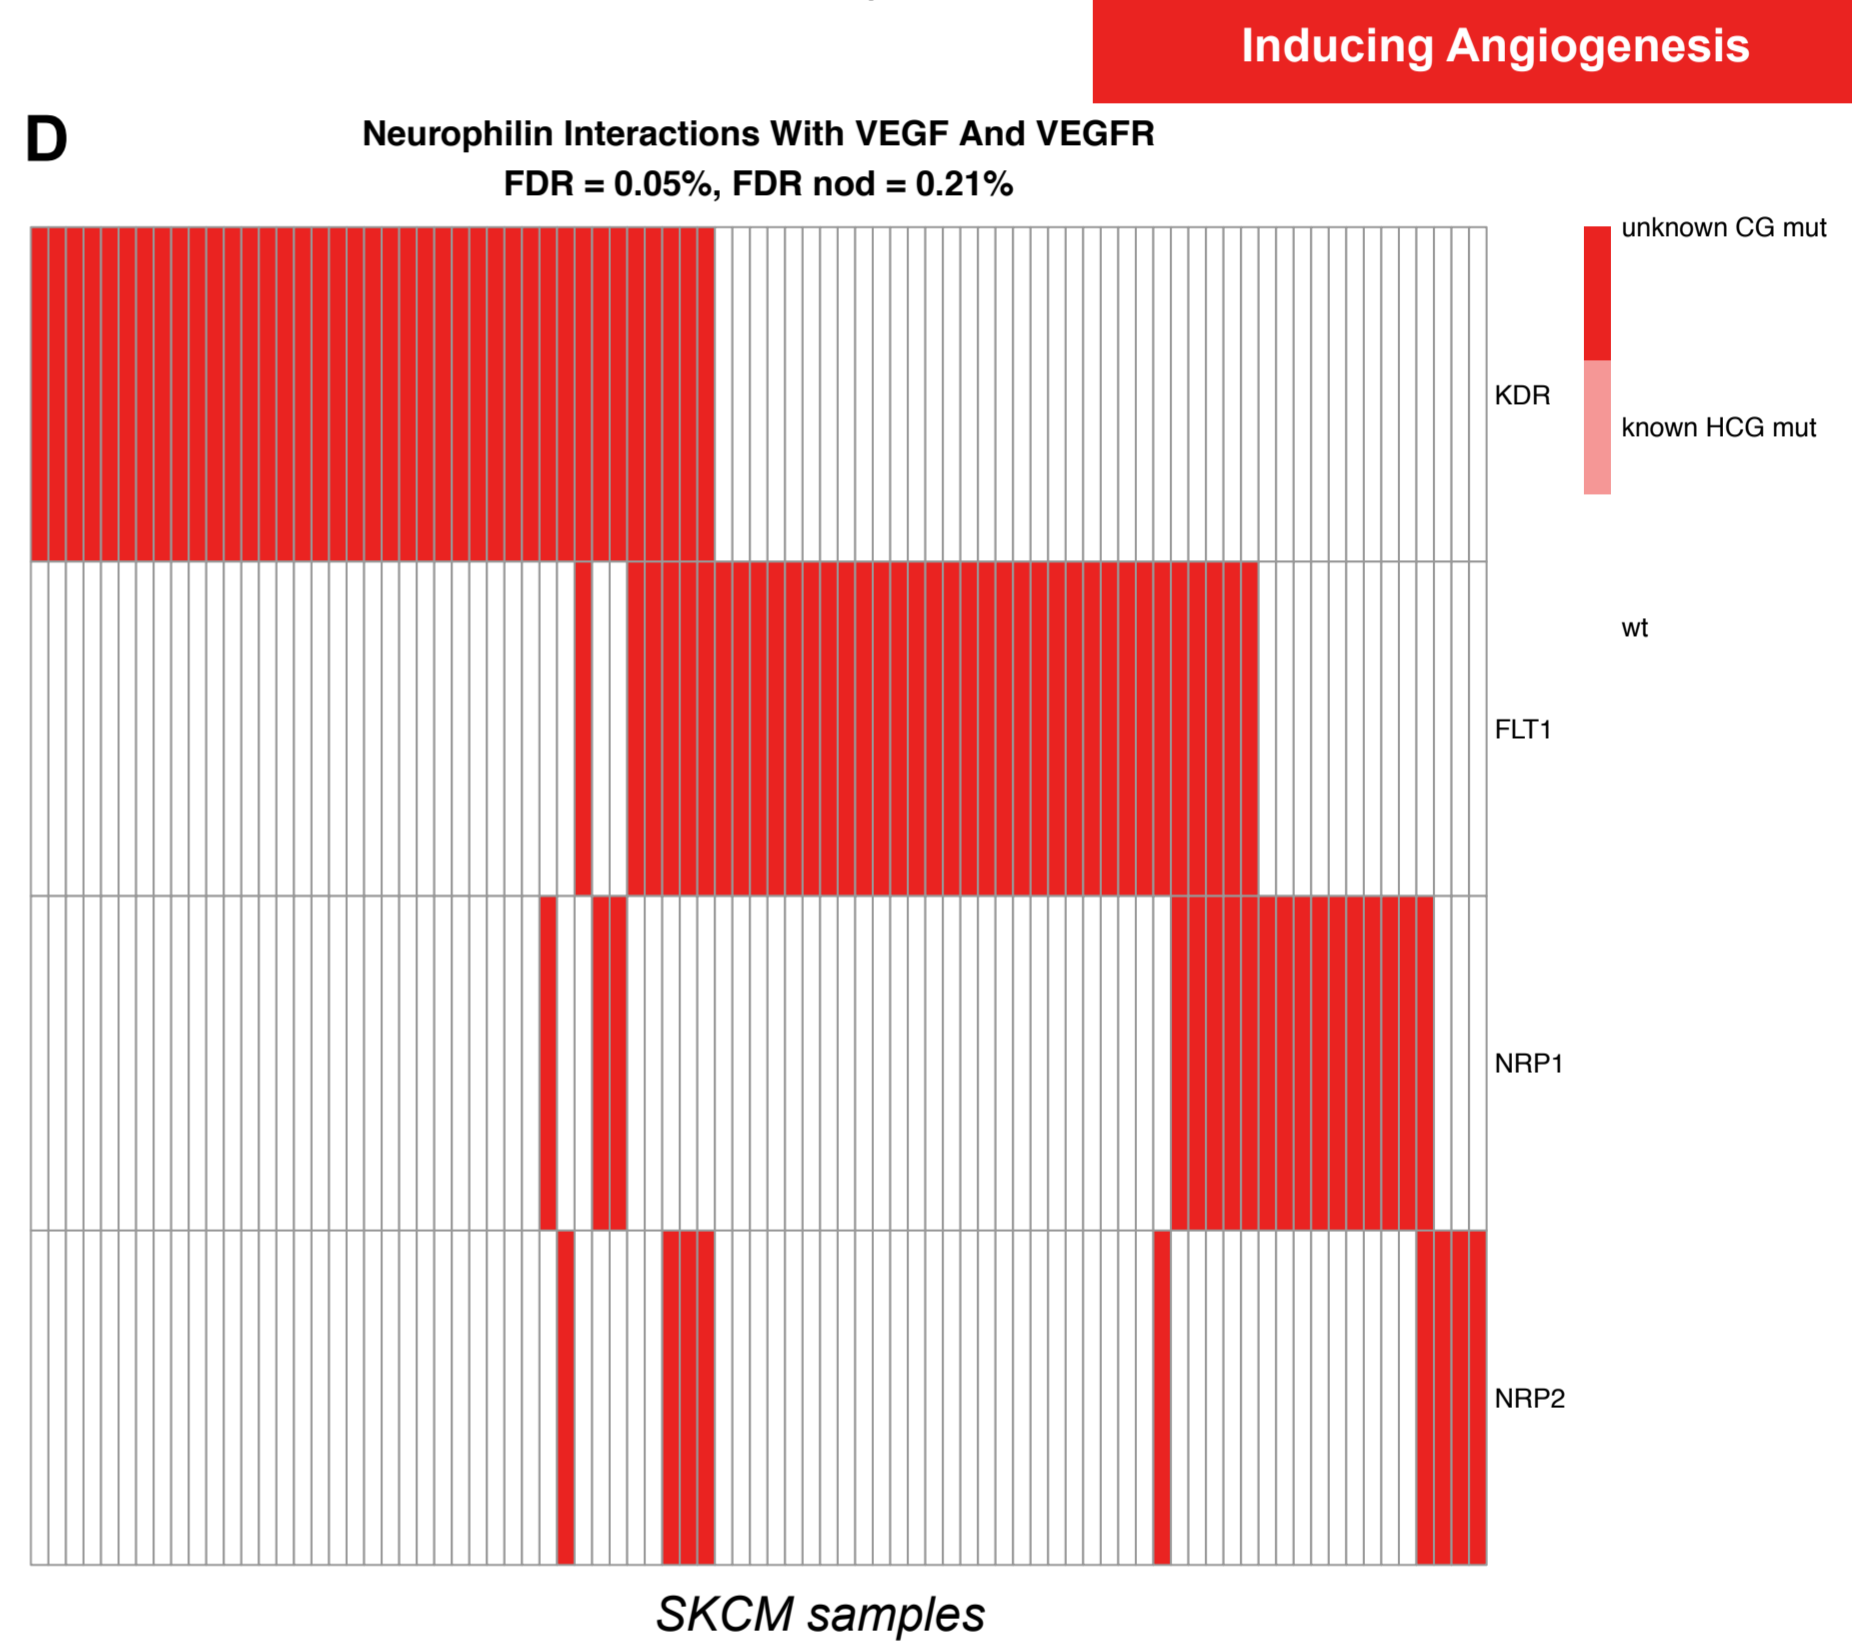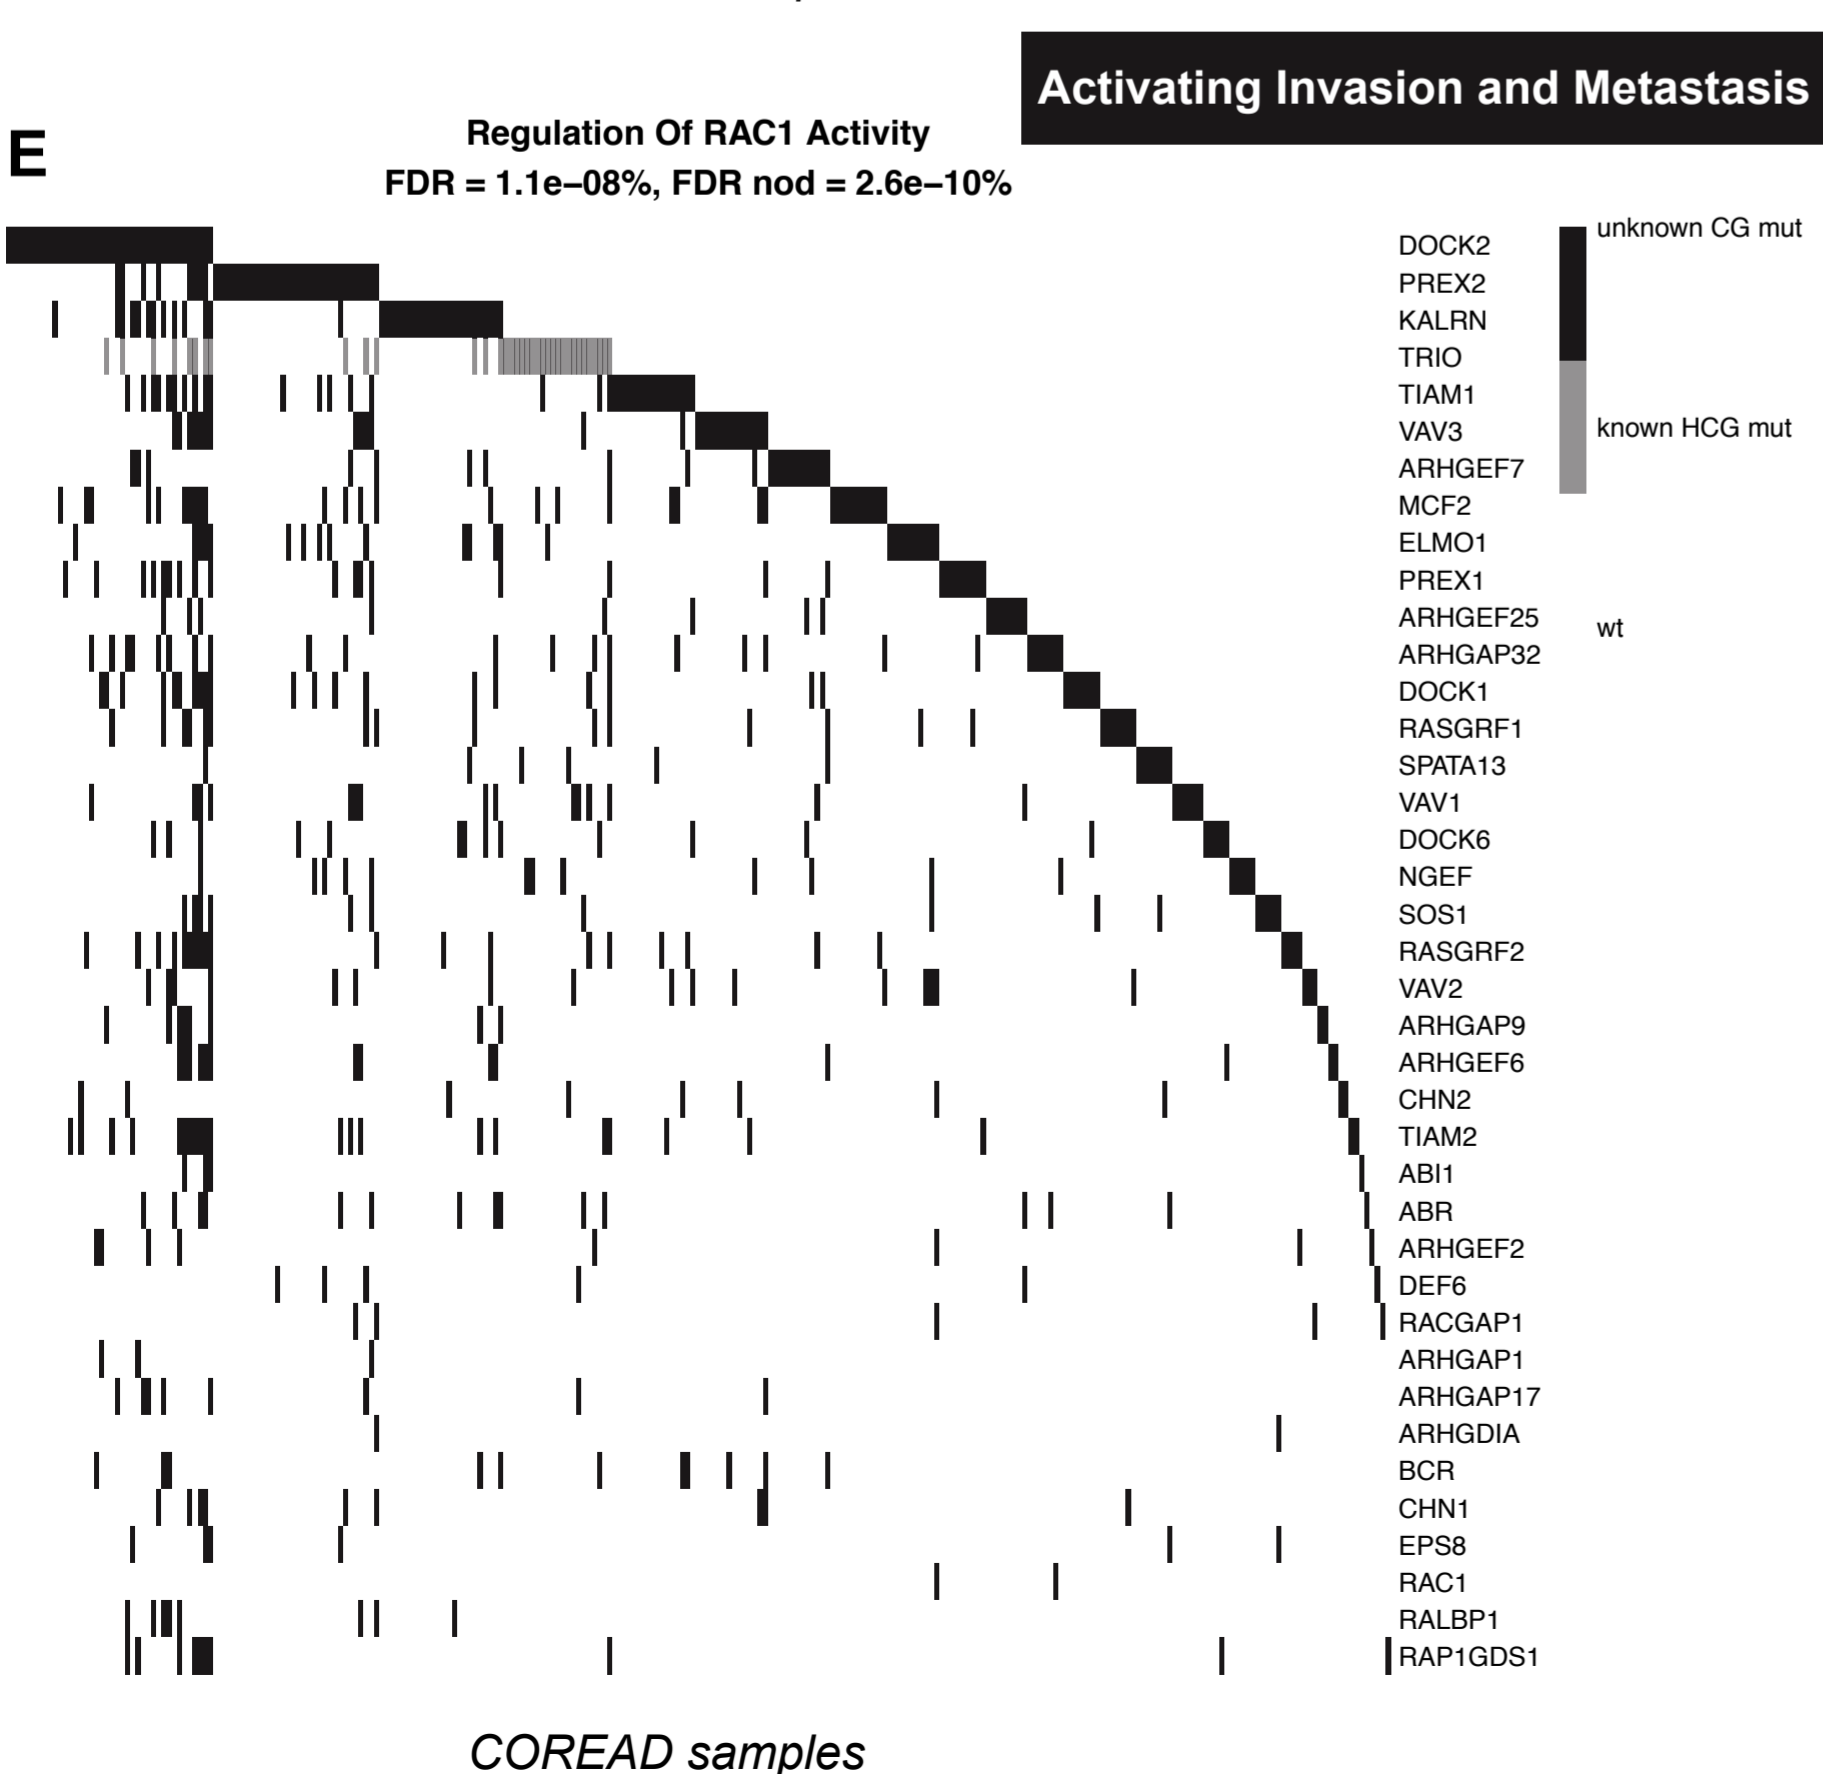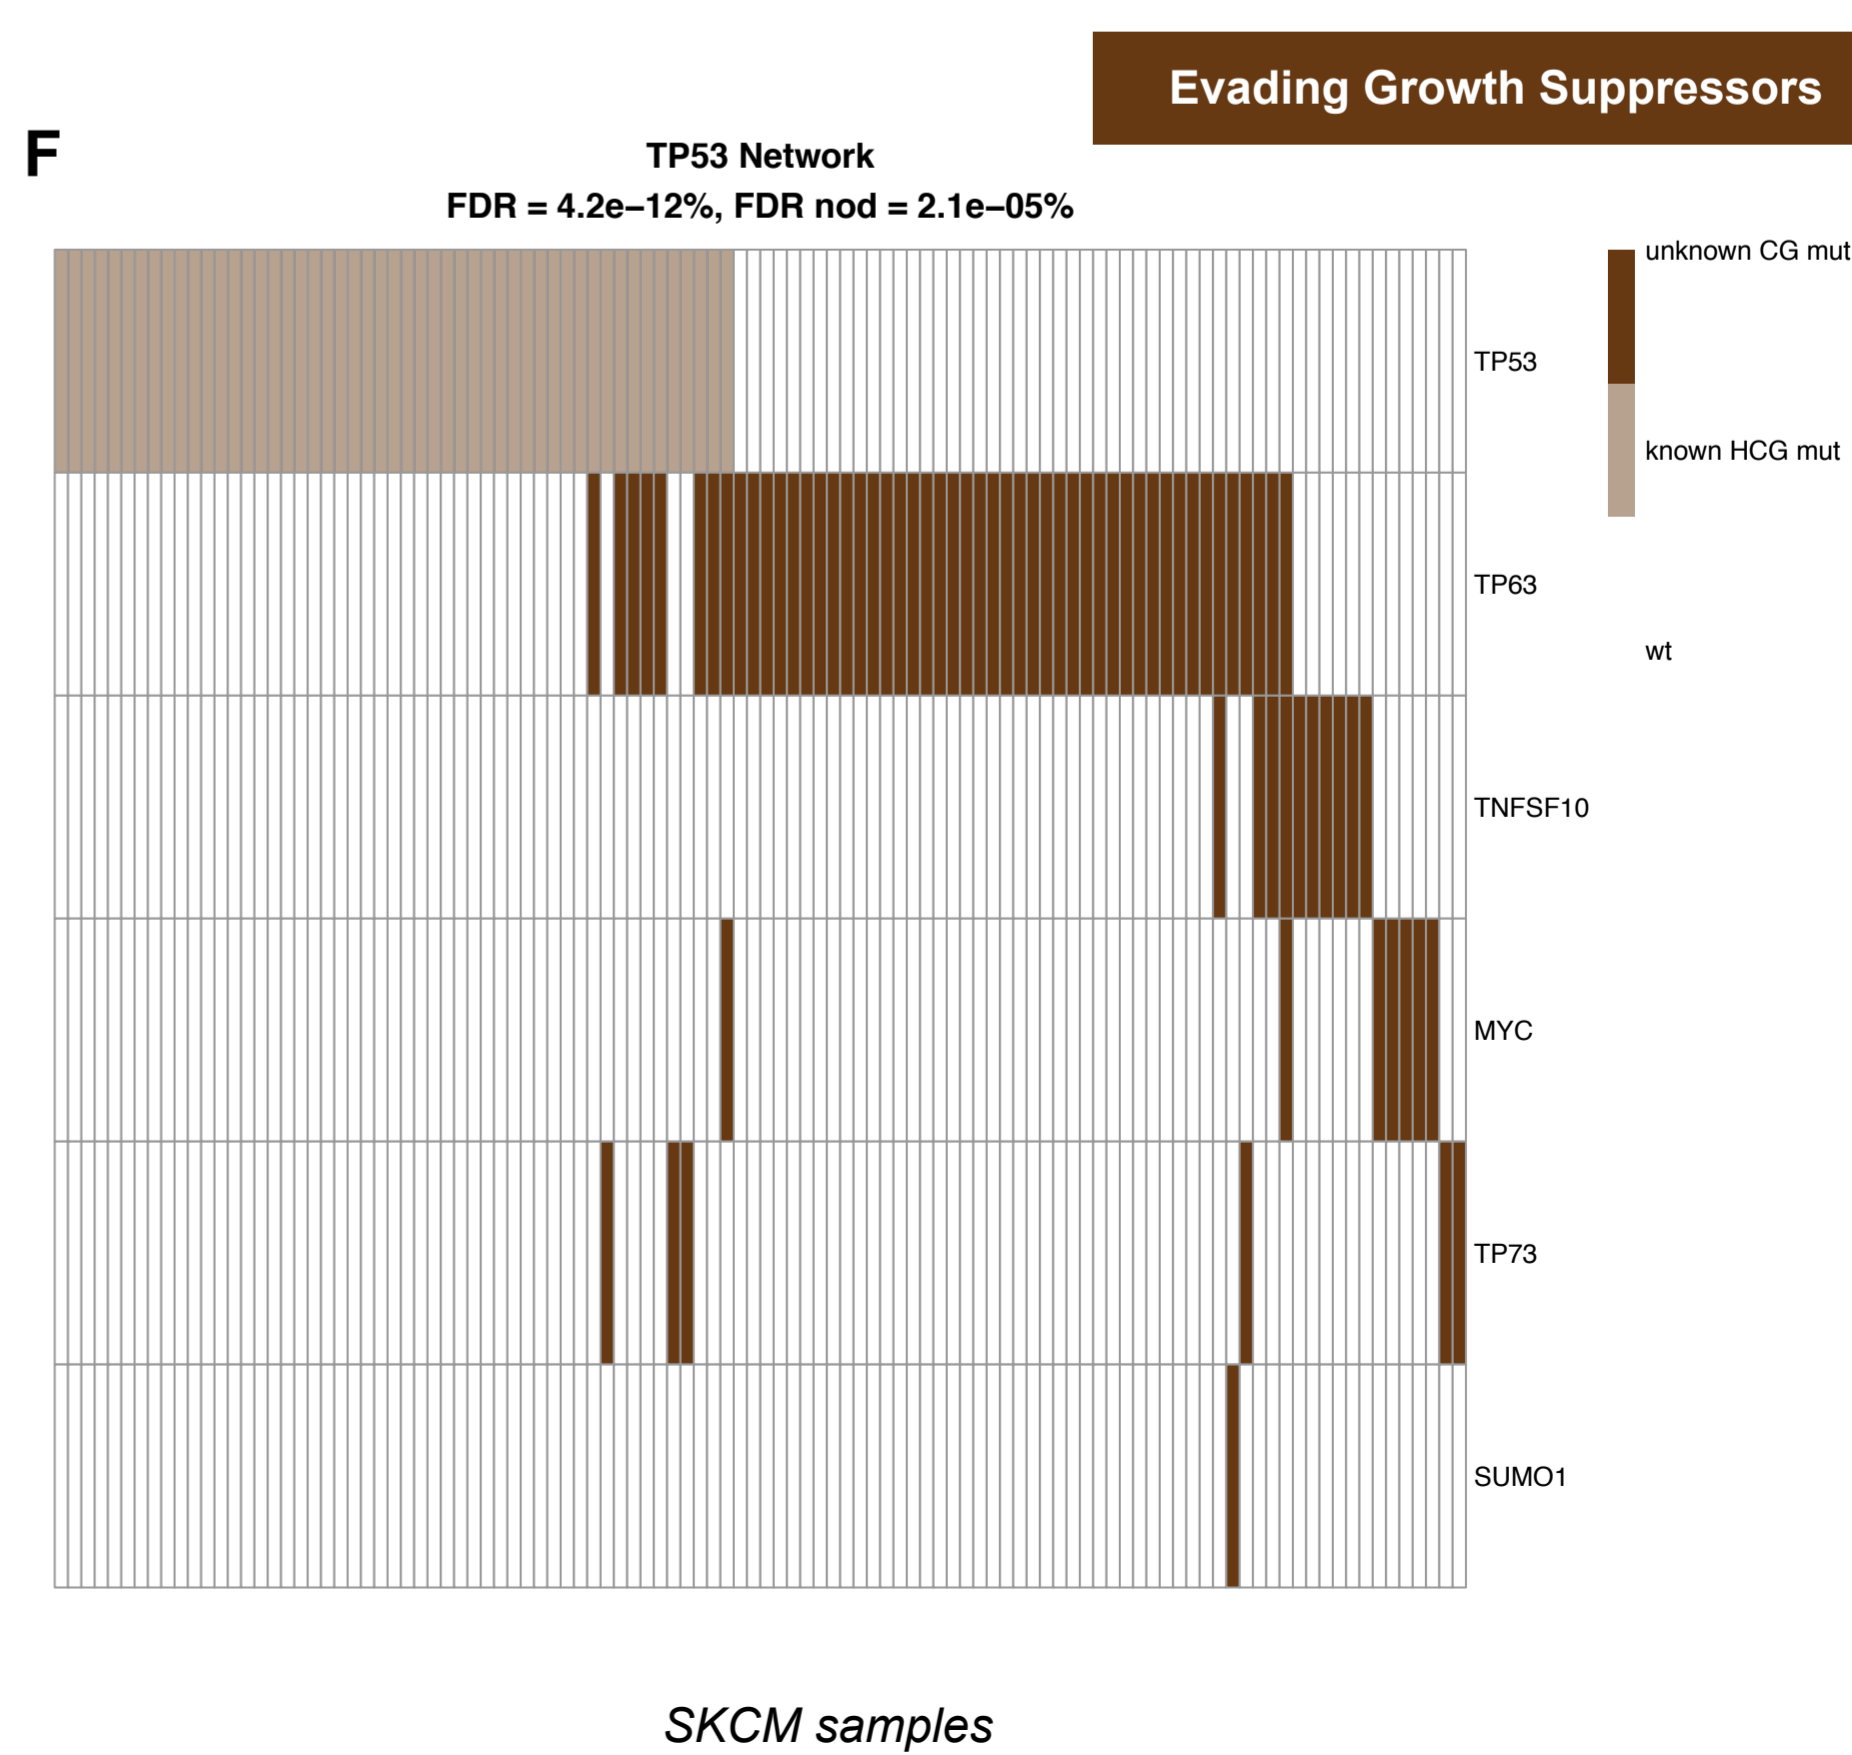

### Inducing Angiogenesis

### Evading Growth Suppressors
